# Supplementary material for: Soybean root transcriptome profiling reveals a nonhost resistant response during Heterodera glycines infection
Source: PLoS One. 2019 May 24;14(5):e0217130. doi: 10.1371/journal.pone.0217130 (PMC6534303; doi:10.1371/journal.pone.0217130)
Supplement: S3 Table — (XLSX) [file pone.0217130.s003.xlsx]

## Sheet: SvsCK
Gene_id	log2FoldChange(SCNSvsCK)	Interpro Description
GLYMA01G41290	-1.77973	-	Tify domain||CO/COL/TOC1, conserved site
GLYMA02G31490	-1.62913	-	EF-hand domain||Protein kinase-like domain||Protein kinase domain||Protein kinase, ATP binding site||EF-hand domain pair||EF-Hand 1, calcium-binding site||Serine/threonine-protein kinase, active site
GLYMA03G36240	-1.64615	-	EF-hand domain||Protein kinase, ATP binding site||EF-hand domain pair||Protein kinase-like domain||Protein kinase domain||EF-Hand 1, calcium-binding site||Serine/threonine-protein kinase, active site
GLYMA04G01531	-1.83115	-	CO/COL/TOC1, conserved site||Tify domain
GLYMA07G04630	-1.42125	-	CO/COL/TOC1, conserved site||Tify domain
GLYMA11G04130	-1.81936	-	CO/COL/TOC1, conserved site||Tify domain
GLYMA12G05610	-1.14654	-	EF-Hand 1, calcium-binding site||EF-hand domain pair||EF-hand domain
GLYMA12G08160	-1.14251	-	Cyclic nucleotide-binding-like||IQ motif, EF-hand binding site||Ion transport domain||Cyclic nucleotide-binding domain||Potassium channel, voltage-dependent, EAG/ELK/ERG||RmlC-like jelly roll fold
GLYMA13G17180	-1.01984	-	CO/COL/TOC1, conserved site||Tify domain
GLYMA15G19840	-1.00039	-	CO/COL/TOC1, conserved site||Tify domain
GLYMA16G01220	-1.52377	-	Tify domain||CO/COL/TOC1, conserved site
GLYMA17G05540	-1.5703	-	Tify domain||CO/COL/TOC1, conserved site
GLYMA19G34280	-1.14821	-	EF-Hand 1, calcium-binding site||EF-hand domain pair||Phosphoglycolate phosphatase, domain 2||EF-hand domain

## Sheet: TvsCK
gene_id	log2FoldChange	Gene name	Interpro Description
GLYMA01G01420	-1.95538	-	Winged helix-turn-helix DNA-binding domain||Leucine-rich repeat domain, L domain-like||NB-ARC||P-loop containing nucleoside triphosphate hydrolase
GLYMA01G02251	-1.02229	-	Transcription factor MYC/MYB N-terminal||Myc-type, basic helix-loop-helix (bHLH) domain
GLYMA01G35120	-1.49674	-	NB-ARC||P-loop containing nucleoside triphosphate hydrolase||Winged helix-turn-helix DNA-binding domain||Leucine-rich repeat domain, L domain-like
GLYMA01G37100	3.8353	-	EF-hand domain||Serine/threonine-protein kinase, active site||EF-Hand 1, calcium-binding site||Protein kinase, ATP binding site||EF-hand domain pair||Protein kinase-like domain||Protein kinase domain
GLYMA01G41290	-1.77454	-	Tify domain||CO/COL/TOC1, conserved site
GLYMA02G00450	1.4768	-	EF-hand domain||EF-Hand 1, calcium-binding site||EF-hand domain pair
GLYMA03G29450	-1.81984	-	EF-hand domain||Protein kinase, ATP binding site||EF-hand domain pair||Protein kinase-like domain||Protein kinase domain||EF-Hand 1, calcium-binding site||Serine/threonine-protein kinase, active site
GLYMA03G31430	-2.54195	-	EF-hand domain pair||EF-Hand 1, calcium-binding site||EF-hand domain||Phosphoglycolate phosphatase, domain 2
GLYMA03G36240	-1.2503	-	EF-hand domain||Protein kinase, ATP binding site||EF-hand domain pair||Protein kinase-like domain||Protein kinase domain||EF-Hand 1, calcium-binding site||Serine/threonine-protein kinase, active site
GLYMA03G39610	1.36124	-	EF-hand domain||Respiratory burst oxidase homologue protein B||FAD-binding 8||NADPH oxidase Respiratory burst||Cytochrome b245, heavy chain||EF-hand domain pair||Ferric reductase transmembrane component-like domain||EF-Hand 1, calcium-binding site||Riboflavin synthase-like beta-barrel||Ferredoxin reductase-type FAD-binding domain||Ferric reductase, NAD binding domain
GLYMA04G01531	1.30079	-	CO/COL/TOC1, conserved site||Tify domain
GLYMA04G17710	2.26546	-	EF-hand domain||EF-Hand 1, calcium-binding site||EF-hand domain pair
GLYMA05G03243	1.30147	--	--
GLYMA05G13900	-1.77304	-	EF-hand domain||Phosphoglycolate phosphatase, domain 2||EF-hand domain pair||EF-Hand 1, calcium-binding site
GLYMA05G24770	-1.73697	-	Leucine-rich repeat domain, L domain-like||Leucine-rich repeat||Protein kinase-like domain||Protein kinase domain||Protein kinase, ATP binding site||Serine/threonine-protein kinase, active site||Leucine-rich repeat-containing N-terminal, plant-type
GLYMA05G33880	-1.99923	-	EF-hand domain pair||EF-Hand 1, calcium-binding site||EF-hand domain
GLYMA05G34640	-2.38975	-	EF-hand domain||EF-hand domain pair||EF-Hand 1, calcium-binding site
GLYMA06G08110	-1.40343	CNGC18	RmlC-like jelly roll fold||Cyclic nucleotide-binding-like||Ion transport domain||Cyclic nucleotide-binding domain
GLYMA06G46830	3.18252	-	Winged helix-turn-helix DNA-binding domain||Leucine-rich repeat domain, L domain-like||NB-ARC||P-loop containing nucleoside triphosphate hydrolase
GLYMA07G04630	2.2077	-	CO/COL/TOC1, conserved site||Tify domain
GLYMA07G36700	1.3315	-	EF-Hand 1, calcium-binding site||EF-hand domain pair||EF-hand domain
GLYMA08G02160	2.20093	-	WRKY domain
GLYMA08G05810	-1.76468	-	EF-Hand 1, calcium-binding site||EF-hand domain pair||EF-hand domain
GLYMA08G36720	9.4796	-	Myc-type, basic helix-loop-helix (bHLH) domain||Transcription factor MYC/MYB N-terminal
GLYMA09G08290	1.1744	-	Tify domain||CO/COL/TOC1, conserved site
GLYMA09G24410	1.48273	-	Ribosomal protein S5 domain 2-type fold||Heat shock protein Hsp90 family||Histidine kinase-like ATPase, C-terminal domain||Heat shock protein Hsp90, N-terminal||Heat shock protein Hsp90, conserved site
GLYMA09G33730	-5.0888	-	Myc-type, basic helix-loop-helix (bHLH) domain||Transcription factor MYC/MYB N-terminal
GLYMA09G34360	-1.05286	-	P-loop containing nucleoside triphosphate hydrolase||NB-ARC||Leucine-rich repeat domain, L domain-like||Winged helix-turn-helix DNA-binding domain
GLYMA09G40740	1.32198	-	EF-Hand 1, calcium-binding site||EF-hand domain pair||EF-hand domain
GLYMA10G00470	-2.87658	-	EF-hand domain pair||EF-Hand 1, calcium-binding site||EF-hand domain
GLYMA10G23620	-1.00246	-	Protein kinase domain||Protein kinase-like domain||EF-hand domain pair||Protein kinase, ATP binding site||Serine/threonine-protein kinase, active site||EF-Hand 1, calcium-binding site||EF-hand domain
GLYMA10G32190	2.26226	-	EF-hand domain||Phosphoglycolate phosphatase, domain 2||EF-hand domain pair||EF-Hand 1, calcium-binding site
GLYMA10G37441	-1.3164	-	HSP20-like chaperone||CS domain||Tetratricopeptide repeat||Tetratricopeptide-like helical domain||Tetratricopeptide repeat-containing domain||SGS domain
GLYMA10G37460	2.35052	-	WRKY domain
GLYMA11G04130	-1.46555	-	CO/COL/TOC1, conserved site||Tify domain
GLYMA11G08180	-1.24017	-	Protein kinase, ATP binding site||EF-hand domain pair||Protein kinase-like domain||Protein kinase domain||EF-Hand 1, calcium-binding site||Serine/threonine-protein kinase, active site||EF-hand domain
GLYMA11G13620	1.28433	-	EF-Hand 1, calcium-binding site||EF-hand domain pair||EF-hand domain
GLYMA12G05610	3.43864	-	EF-Hand 1, calcium-binding site||EF-hand domain pair||EF-hand domain
GLYMA12G08160	1.64352	-	Cyclic nucleotide-binding-like||IQ motif, EF-hand binding site||Ion transport domain||Cyclic nucleotide-binding domain||Potassium channel, voltage-dependent, EAG/ELK/ERG||RmlC-like jelly roll fold
GLYMA12G09550	2.32276	-	EF-Hand 1, calcium-binding site||EF-hand domain pair||EF-hand domain
GLYMA13G17180	1.3197	-	CO/COL/TOC1, conserved site||Tify domain
GLYMA14G24810	8.02931	-	EF-hand domain pair||EF-Hand 1, calcium-binding site||EF-hand domain
GLYMA14G40090	3.00504	-	EF-Hand 1, calcium-binding site||Serine/threonine-protein kinase, active site||EF-hand domain pair||Protein kinase, ATP binding site||Protein kinase domain||Protein kinase-like domain||EF-hand domain
GLYMA15G03460	-6.50719	-	EF-hand domain pair||EF-Hand 1, calcium-binding site||EF-hand domain
GLYMA15G06830	1.08401	-	Allergen V5/Tpx-1-related, conserved site||Cysteine-rich secretory protein, allergen V5/Tpx-1-related||CAP domain||Pathogenesis-related protein 1-like, SCP domain
GLYMA15G18860	-2.24879	-	Serine/threonine-protein kinase, active site||Protein kinase-like domain||Protein kinase domain||Protein kinase, ATP binding site
GLYMA15G19840	-1.03645	-	CO/COL/TOC1, conserved site||Tify domain
GLYMA16G01220	-2.34549	-	Tify domain||CO/COL/TOC1, conserved site
GLYMA16G06390	-2.19723	-	EF-Hand 1, calcium-binding site||EF-hand domain pair||EF-hand domain
GLYMA16G29750	1.01775	-	Histidine kinase-like ATPase, C-terminal domain||Heat shock protein Hsp90, N-terminal||Heat shock protein Hsp90, conserved site||Heat shock protein Hsp90 family||Ribosomal protein S5 domain 2-type fold
GLYMA16G34370	1.97247	-	Cyclic nucleotide-binding-like||Cyclic nucleotide-binding domain||Ion transport domain||RmlC-like jelly roll fold
GLYMA17G03910	-2.52618	-	EF-hand domain pair||EF-Hand 1, calcium-binding site||EF-hand domain
GLYMA17G05540	-2.0728	-	Tify domain||CO/COL/TOC1, conserved site
GLYMA17G20160	-1.00881	-	EF-Hand 1, calcium-binding site||EF-hand domain pair||EF-hand domain
GLYMA18G09670	-1.01479	-	Winged helix-turn-helix DNA-binding domain||Leucine-rich repeat domain, L domain-like||NB-ARC||P-loop containing nucleoside triphosphate hydrolase
GLYMA18G09720	-1.72946	-	Leucine-rich repeat domain, L domain-like||Winged helix-turn-helix DNA-binding domain||P-loop containing nucleoside triphosphate hydrolase||NB-ARC
GLYMA18G09920	1.35404	-	Leucine-rich repeat domain, L domain-like||Winged helix-turn-helix DNA-binding domain||P-loop containing nucleoside triphosphate hydrolase||NB-ARC
GLYMA18G09980	-1.8977	-	Winged helix-turn-helix DNA-binding domain||Leucine-rich repeat domain, L domain-like||NB-ARC||P-loop containing nucleoside triphosphate hydrolase
GLYMA19G19680	1.57463	-	EF-hand domain pair||EF-Hand 1, calcium-binding site||EF-hand domain||Phosphoglycolate phosphatase, domain 2
GLYMA19G32260	-1.37134	-	Serine/threonine-protein kinase, active site||EF-Hand 1, calcium-binding site||EF-hand domain pair||Protein kinase, ATP binding site||Protein kinase domain||Protein kinase-like domain||EF-hand domain
GLYMA19G34280	-1.02222	-	EF-Hand 1, calcium-binding site||EF-hand domain pair||Phosphoglycolate phosphatase, domain 2||EF-hand domain
GLYMA19G38890	3.21468	-	EF-Hand 1, calcium-binding site||Serine/threonine-protein kinase, active site||Protein kinase-like domain||Protein kinase domain||Protein kinase, ATP binding site||EF-hand domain pair||EF-hand domain
GLYMA19G42220	1.53398	-	FAD-binding 8||NADPH oxidase Respiratory burst||Cytochrome b245, heavy chain||EF-hand domain||Respiratory burst oxidase homologue protein B||EF-Hand 1, calcium-binding site||EF-hand domain pair||Ferric reductase transmembrane component-like domain||Ferredoxin reductase-type FAD-binding domain||Riboflavin synthase-like beta-barrel||Ferric reductase, NAD binding domain
GLYMA19G44451	-1.18349	-	Cyclic nucleotide-binding-like||IQ motif, EF-hand binding site||Ion transport domain
GLYMA20G35440	1.44711	-	EF-hand domain pair||EF-Hand 1, calcium-binding site||EF-hand domain||Phosphoglycolate phosphatase, domain 2
